# Supplementary material for: Meaningful Changes in What Matters to Individuals with Vitiligo: Content Validity and Meaningful Change Thresholds of the Vitiligo Area Scoring Index (VASI)
Source: Springer Nature journal article supplement (doi:10.1007/s13555-022-00752-8), 2022-06-30
Supplement: MOESM1 [file 23224052]

## **Title**

Meaningful Changes in What Matters to Individuals with Vitiligo: Content Validity and Meaningful Change Thresholds of the Vitiligo Area Scoring Index (VASI)

## **Authors/Affiliations**

Helen Kitchen<sup>1</sup>, Kathleen W. Wyrwich<sup>2‡</sup>, Chloe Carmichael<sup>1</sup>, Linda S. Deal<sup>2</sup>, Tatjana Lukic<sup>2</sup>, Tamara Al-Zubeidi<sup>1</sup>, Chris Marshall<sup>1</sup>, Hannah Pegram<sup>1‡</sup>, Iltefat H. Hamzavi<sup>3</sup>, Brett King<sup>4</sup>

1 Clinical Outcomes Assessment, Clarivate, UK

2 Pfizer Inc, NYC, NY, US

3 Henry Ford Medical Centre, US

4 Yale Dermatology, Middlebury, US

‡Affiliation when this study was conducted.

Dr King and Dr Hamzavi contributed equally to the senior authorship of this paper

## **Corresponding author**

Helen Kitchen, Clarivate

Helen.kitchen@clarivate.com

## Supplementary material

### Supplementary material 1. Schematic of Research Process

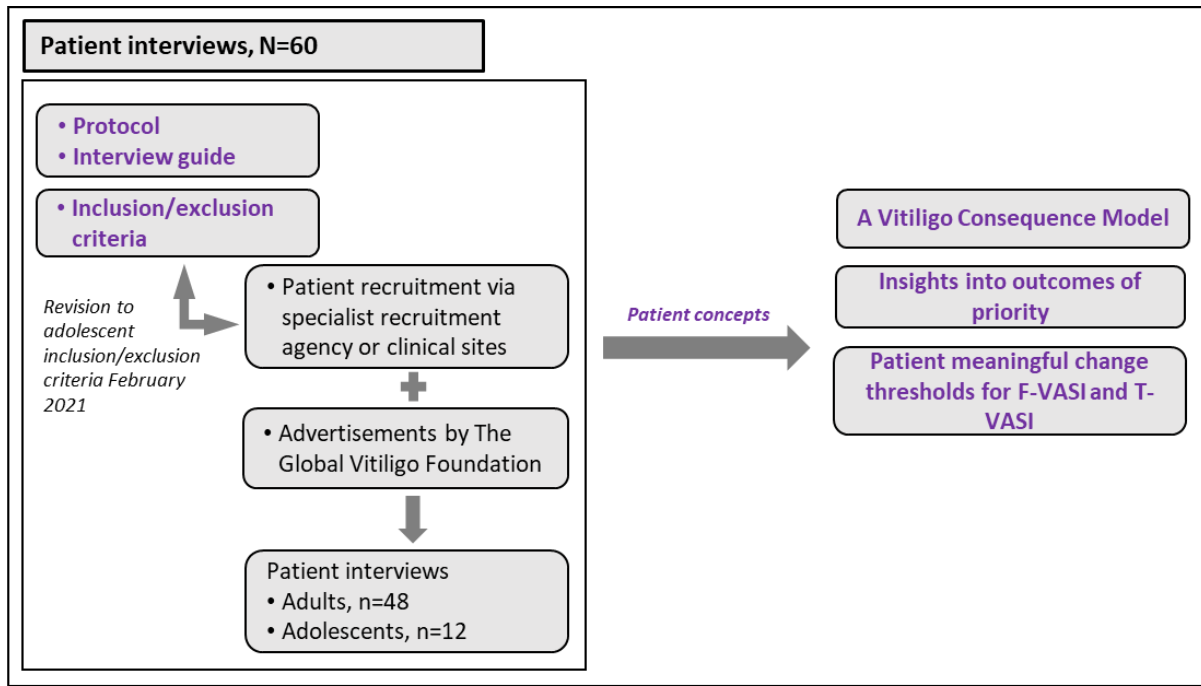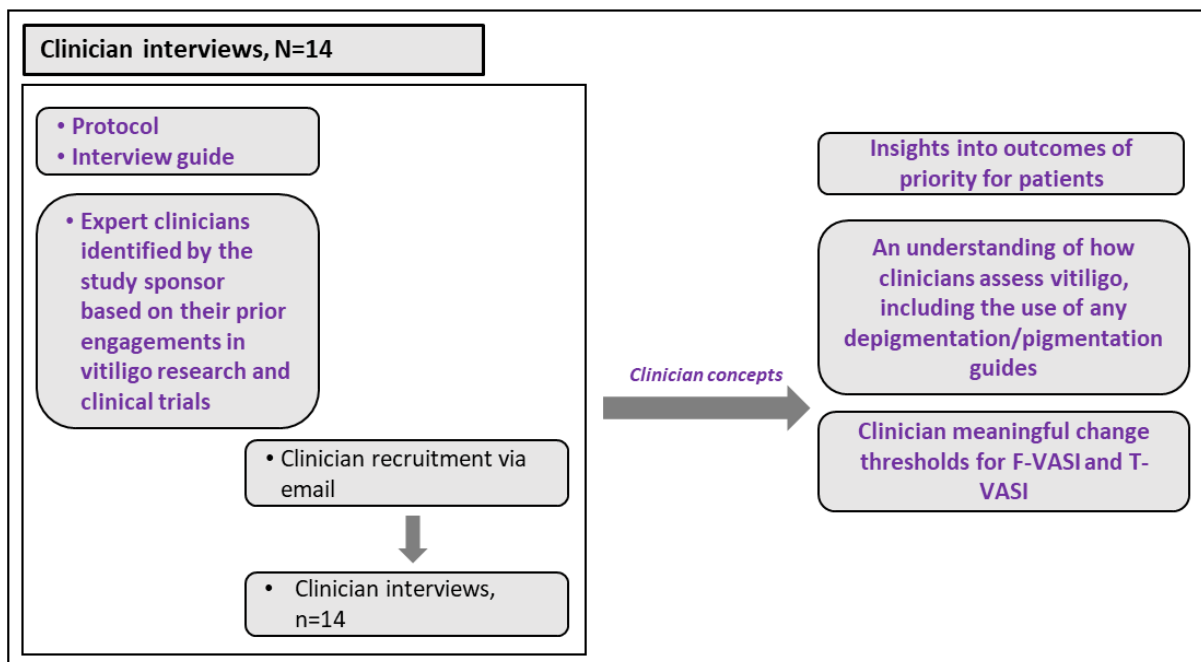

Abbreviations: F-VASI, Facial Vitiligo Area Scoring Index; T-VASI, Total body Vitiligo Area Scoring Index

Key: Purple font reflects outputs from the research process; black font reflects the methodological steps undertaken to achieve the outputs.

**Supplementary material 2. Sampling quotas**

|                                                                                                                                                                                                                                                       |
|-------------------------------------------------------------------------------------------------------------------------------------------------------------------------------------------------------------------------------------------------------|
| Representation of FST 1-6                                                                                                                                                                                                                             |
| Sex (>25% male; >25% female)                                                                                                                                                                                                                          |
| Education level (~35% high school only, with or without diploma)                                                                                                                                                                                      |
| 1 <sup>st</sup> or 2 <sup>nd</sup> generation living in the US from the Middle East (e.g. Egypt, Iran, Israel, Iraq, Qatar, Syria), Asia (e.g. China, India, Pakistan, Thailand, Indonesia) or Africa (e.g. Nigeria, Ethiopia) (~15% of total sample) |
| Low level of facial vitiligo ( $n \leq 10$ patients with 0.25-0.50 BSA)                                                                                                                                                                               |
| Improved vitiligo within 12 months ( $n \geq 10$ )                                                                                                                                                                                                    |

**Supplementary material 3. Additional demographic and clinical sample characteristics**

| Demographic characteristic                                     | Adults<br>(N=48)<br>n (%) | Adolescents<br>(N=12)<br>n (%) | TOTAL<br>(N=60)<br>n (%) |
|----------------------------------------------------------------|---------------------------|--------------------------------|--------------------------|
| <b>Self-reported demographic characteristics (N=60)</b>        |                           |                                |                          |
| <b>Work status</b>                                             |                           |                                |                          |
| Working paid                                                   | 34 (71%)                  | 1 (8%)                         | 35 (58%)                 |
| Student                                                        | 3 (6%)                    | 12 (100%)                      | 15 (25%)                 |
| Homemaker                                                      | 4 (8%)                    | -                              | 4 (7%)                   |
| Other                                                          | 6 (13%)                   | -                              | 6 (10%)                  |
| Retired                                                        | 1 (2%)                    | -                              | 1 (2%)                   |
| <b>Self-reported improvement in vitiligo in past 12 months</b> |                           |                                |                          |
| No                                                             | 40 (83%)                  | 7 (58%)                        | 47 (78%)                 |
| Yes                                                            | 8 (17%)                   | 4 (33%)                        | 12 (20%)                 |
| Don't know                                                     | -                         | 1 (8%)                         | 1 (2%)                   |
| <b>Clinician-reported clinical characteristics (N=60)</b>      |                           |                                |                          |
| <b>Disease activity (Face)</b>                                 |                           |                                |                          |
| New/extending lesion(s) in the past 3 months                   | 29 (60%)                  | 9 (75%)                        | 38 (63%)                 |
| Confetti-like lesion(s)                                        | 8 (17%)                   | -                              | 8 (13%)                  |
| Trichrome lesion(s)                                            | 7 (15%)                   | -                              | 7 (12%)                  |
| Koebner phenomenon/phenomena                                   | 2 (4%)                    | -                              | 2 (3%)                   |
| Coexistence of halo nevus/nevi                                 | 1 (2%)                    | -                              | 1 (2%)                   |
| Unable to say based on patient's clinic records <sup>†</sup>   | 10 (21%)                  | 2 (17%)                        | 12 (20%)                 |
| <b>Disease activity (Body)</b>                                 |                           |                                |                          |
| New/extending lesion(s) in the past 3 months                   | 31 (65%)                  | 8 (67%)                        | 39 (65%)                 |
| Confetti-like lesion(s)                                        | 7 (15%)                   | -                              | 7 (12%)                  |
| Trichrome lesion(s)                                            | 7 (15%)                   | -                              | 7 (12%)                  |
| Koebner phenomenon/phenomena                                   | 1 (2%)                    | -                              | 1 (2%)                   |
| Coexistence of halo nevus/nevi                                 | 2 (4%)                    | -                              | 2 (3%)                   |
| Unable to say based on patient's clinic records <sup>†</sup>   | 7 (15%)                   | 3 (25%)                        | 10 (17%)                 |
| <b>Comorbidities (selected from a pre-defined list)</b>        |                           |                                |                          |
| Anxiety                                                        | 16 (33%)                  | 6 (50%)                        | 22 (37%)                 |
| Thyroid disease                                                | 9 (19%)                   | 2 (17%)                        | 11 (18%)                 |
| Depression                                                     | 8 (17%)                   | 1 (8%)                         | 9 (15%)                  |
| ADHD                                                           | 1 (2%)                    | 4 (33%)                        | 5 (8%)                   |
| Diabetes – Type 1                                              | 4 (8%)                    | 1 (8%)                         | 5 (8%)                   |
| Arthritis                                                      | 5 (10%)                   | -                              | 5 (8%)                   |
| Asthma                                                         | 2 (4%)                    | 2 (17%)                        | 4 (7%)                   |
| Alopecia areata                                                | 3 (6%)                    | 1 (8%)                         | 4 (7%)                   |
| Rheumatoid arthritis                                           | 3 (6%)                    | -                              | 3 (5%)                   |
| IBD                                                            | 3 (6%)                    | -                              | 3 (5%)                   |
| Cardiovascular disease                                         | 3 (6%)                    | -                              | 3 (5%)                   |
| Cancer (excluding skin cancers)                                | 2 (4%)                    | -                              | 2 (3%)                   |
| Other <sup>‡</sup>                                             | 4 (8%)                    | -                              | 4 (7%)                   |

| Demographic characteristic                  | Adults<br>(N=48)<br>n (%) | Adolescents<br>(N=12)<br>n (%) | TOTAL<br>(N=60)<br>n (%) |
|---------------------------------------------|---------------------------|--------------------------------|--------------------------|
| <b>Current treatment(s)*</b>                |                           |                                |                          |
| Tacrolimus                                  | 5 (10%)                   | 3 (25%)                        | 8 (13%)                  |
| Phototherapy/NBUVB                          | 3 (6%)                    | 2 (17%)                        | 5 (8%)                   |
| Sunscreen                                   | 2 (4%)                    | 1 (8%)                         | 3 (5%)                   |
| Pimecrolimus                                | 2 (4%)                    |                                | 2 (3%)                   |
| Meclizine                                   | 2 (4%)                    | -                              | 2 (3%)                   |
| Other <sup>§</sup>                          | 5 (10%)                   | 1 (8%)                         | 6 (10%)                  |
| <i>No current treatment(s)<br/>reported</i> | 32 (67%)                  | 6 (50%)                        | 38 (63%)                 |
| <b>Previous treatment (s)*</b>              |                           |                                |                          |
| Steroids/topical creams                     | 8 (17%)                   | 6 (50%)                        | 14 (23%)                 |
| Phototherapy/NBUVB                          | 9 (19%)                   | 2 (17%)                        | 11 (18%)                 |
| Pimecrolimus                                | 3 (4%)                    | 3 (25%)                        | 6 (10%)                  |
| Laser therapy                               | 4 (8%)                    | 1 (8%)                         | 5 (8%)                   |
| Clobetasol                                  | 4 (8%)                    | -                              | 4 (7%)                   |
| Tacrolimus                                  | 4 (8%)                    | -                              | 4 (7%)                   |
| Other <sup>¶</sup>                          | 4 (8%)                    | 1 (8%)                         | 5 (8%)                   |
| <i>No previous treatments<br/>reported</i>  | 19 (40%)                  | 2 (17%)                        | 21 (35%)                 |
| <b>Discontinuation reason*</b>              | <b>n=24</b>               | <b>n=7</b>                     | <b>n=31</b>              |
| Ineffective                                 | 19 (79%)                  | 6 (86%)                        | 25 (81%)                 |
| Cost                                        | 2 (8%)                    | -                              | 2 (6%)                   |
| Switched to alternative                     | 2 (8%)                    | -                              | 2 (6%)                   |
| Other <sup>**</sup>                         | 3 (13%)                   | 1 (14%)                        | 4 (13%)                  |

<sup>†</sup>Clinicians could select this option in instances where they could not see the individual in-person due to the COVID-19 pandemic; \* Multiple treatments (and reasons for discontinuation) may have been reported for each patient.

<sup>‡</sup>Other comorbidities included type 2 diabetes, skin cancer, chronic kidney disease, epilepsy, multiple sclerosis, Sjogren syndrome and chronic obstructive pulmonary disease (each reported by N=1; multiple comorbidities may have been reported for each patient).

<sup>§</sup>Other current treatments included triamcinolone (n=2), clobetasol, desonide, hydrocortisone, tofacitinib, crisaborole, an unspecified topical steroid and Excimer laser treatment (each reported by N=1; multiple treatments may have been reported for each patient).

<sup>¶</sup>Other previous treatments included liquid nitrogen, triamcinolone, Medclizine, supplements (including vitamins C, B12 and folic acid), pUVA and "tanning" (each reported by N=1; multiple treatments may have been reported for each patient).

<sup>\*\*</sup>Other reasons for treatment discontinuation included the result being achieved, the treatment being too strong for the face, Covid and "location" (each reported by N=1).

**Supplementary material 4. Patient sub-group comparisons of F-VASI and T-VASI thresholds**

| Threshold            | Subgroup<br>(Number of patients asked) | Treatment<br>success | Somewhat<br>successful | Not a<br>success | Other<br>response/<br>Not asked |
|----------------------|----------------------------------------|----------------------|------------------------|------------------|---------------------------------|
| <b><u>F-VASI</u></b> |                                        |                      |                        |                  |                                 |
| F-VASI 50            | Adults (n=48)                          | 28 (58%)             | 2 (4%)                 | 12 (25%)         | 6 (13%)                         |
|                      | Adolescents (n=11)                     | 11 (100%)            | -                      | -                | -                               |
| F-VASI 75            | Adults (n=48)                          | 39 (81%)             | 6 (13%)                | 3 (6%)           | -                               |
|                      | Adolescents (n=11)                     | 11 (100%)            | -                      | -                | -                               |
| F-VASI 90            | Adults (n=48)                          | 47 (98%)             | -                      | 1 (2%)           | -                               |
|                      | Adolescents (n=11)                     | 11 (100%)            | -                      | -                | -                               |
| <b><u>T-VASI</u></b> |                                        |                      |                        |                  |                                 |
| T-VASI 33            | Adults (n=40)                          | 21 (53%)             | 5 (13%)                | 10 (25%)         | 4 (10%)                         |
|                      | Adolescents (n=10)                     | 9 (90%)              | -                      | 1 (10%)          | -                               |
| T-VASI 50            | Adults (n=38)                          | 30 (79%)             | 2 (5%)                 | 5 (13%)          | 1 (3%)                          |
|                      | Adolescents (n=10)                     | 10 (100%)            | -                      | -                | -                               |
| T-VASI 75            | Adults (n=38)                          | 35 (92%)             | 1 (3%)                 | 2 (5%)           | -                               |
|                      | Adolescents (n=10)                     | 10 (100%)            | -                      | -                | -                               |
